# Supplementary material for: Large-scale synthesis of Notum inhibitor 1-(2,4-dichloro-3-(trifluoromethyl)-phenyl)-1 H -1,2,3-triazole (ARUK3001185) employing a modified Sakai reaction as the key step
Source: Royal Society of Chemistry journal article supplement (doi:10.1039/d2ra05132j), 2022-01-01
Supplement: d2ra05132j1.pdf [file d2ra05132j1.pdf]

ELECTRONIC SUPPORTING INFORMATION

**Large scale synthesis of Notum inhibitor 1-(2,4-dichloro-3-(trifluoromethyl)phenyl)-1*H*-1,2,3-triazole (ARUK3001185) employing a modified Sakai reaction as the key step**

Benjamin N. Atkinson,<sup>1</sup> Nicky J. Willis,<sup>1</sup> Jennifer Smith,<sup>2</sup> Rebecca Gill,<sup>2</sup> Jody Ali,<sup>2</sup> Zhou Xu,<sup>3</sup> Ping-Shan Lai<sup>3</sup>

and Paul V. Fish.<sup>1,\*</sup>

<sup>1</sup> Alzheimer's Research UK UCL Drug Discovery Institute, University College London, Cruciform Building, Gower Street, London, WC1E 6BT, U.K.

<sup>2</sup> Key Organics Ltd, Highfield Road Industrial Estate, Camelford, Cornwall, PL32 9RA, U.K.

<sup>3</sup> WuXi AppTec (Tianjin) Co., Ltd., 168 Nanhai Road, 10th Avenue, Tianjin Economic-Technological Development Area (TEDA), Tianjin 300457, P.R. China.

\* PVF: Phone: +44 (0)20 7679 6971; E-mail: p.fish@ucl.ac.uk;

## Table of Contents

Page

|     |                                                                                                                                                      |
|-----|------------------------------------------------------------------------------------------------------------------------------------------------------|
| S3  | <b>Figure S1:</b> Differential Scanning Calorimetry (DSC) of <b>1</b><br><b>Figure S2:</b> <sup>1</sup> H NMR of <b>1</b>                            |
| S4  | <b>Figure S3:</b> <sup>13</sup> C and DEPT NMR of <b>1</b><br><b>Figure S4:</b> <sup>19</sup> F NMR of <b>1</b>                                      |
| S5  | <b>Figure S5:</b> HPLC of <b>1</b><br><b>Figure S6:</b> LCMS of <b>1</b>                                                                             |
| S6  | <b>Figures S7A-C:</b> Spectral and analytical data for 2,4-dichloro-3-(trifluoromethyl)aniline ( <b>4</b> )                                          |
| S8  | <b>Figures S8A-D:</b> Spectral and analytical data for minor impurity 1-(2-chloro-3-(trifluoromethyl)phenyl)-1 <i>H</i> -1,2,3-triazole ( <b>9</b> ) |
| S11 | <b>Table S1:</b> Pilot reactions for the chlorination of 2-chloro-3-(trifluoromethyl)aniline ( <b>3</b> ) with <i>N</i> -chlorosuccinimide.          |

**Figure S1:** Differential Scanning Calorimetry (DSC) of **1**

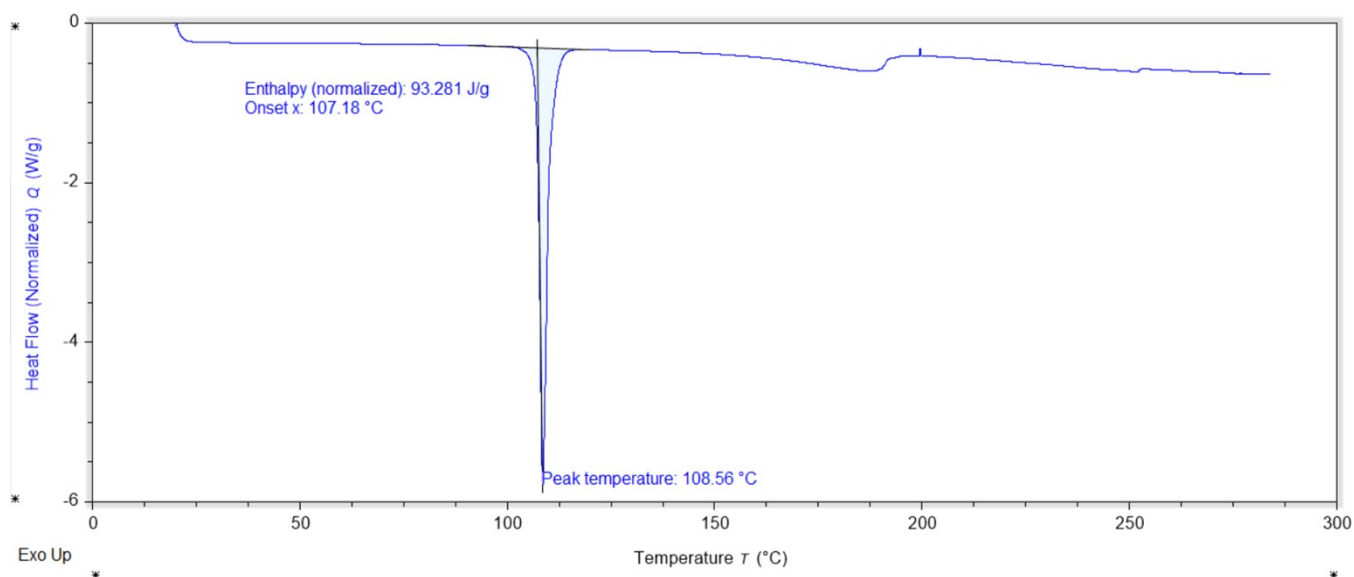

Figure S1. DSC displays an enthalpy of fusion (melt) with an onset at 107.2 °C, a peak at 108.6 °C, and an enthalpy of 93.3 J/g.

**Figure S2:** <sup>1</sup>H NMR of **1**

<sup>1</sup>H NMR (400 MHz, CDCl<sub>3</sub>) δ 7.96 (d, *J* = 1.1 Hz, 1H), 7.90 (d, *J* = 1.1 Hz, 1H), 7.70 – 7.61 (m, 2H).

Chemist JS  
HW-6003-b1

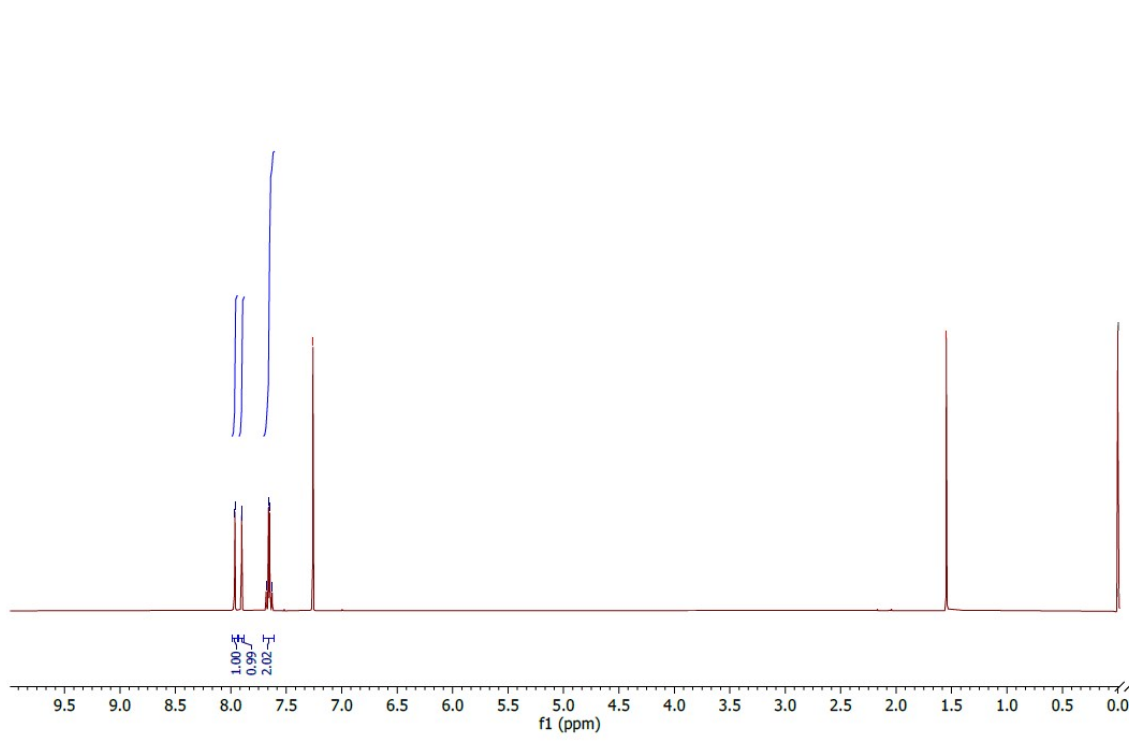

Figure S3:  $^{13}\text{C}$  and DEPT NMR of 1

$^{13}\text{C}$  NMR (101 MHz,  $\text{CDCl}_3$ )  $\delta$  136.37, 135.76, 133.92, 131.52, 130.98, 130.78, 128.16, 127.84, 126.00, 120.65.

Chemist JS  
HW-6003-b1

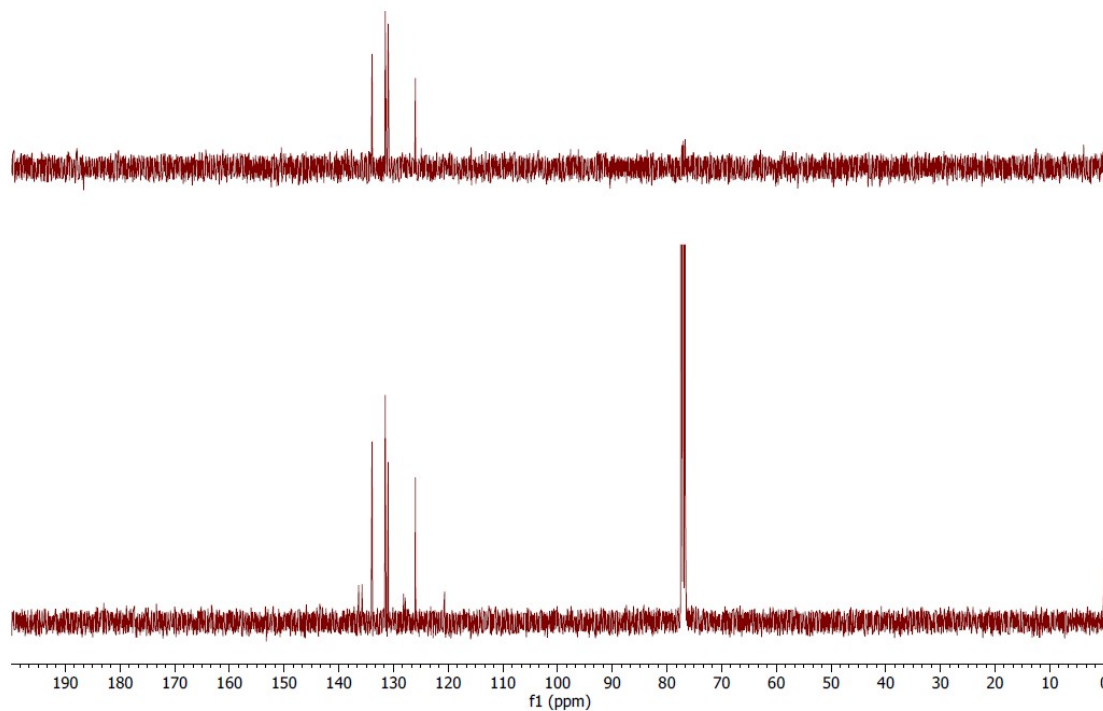

Figure S4:  $^{19}\text{F}$  NMR of 1

-55.794

Supervisor: Tao

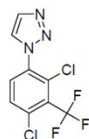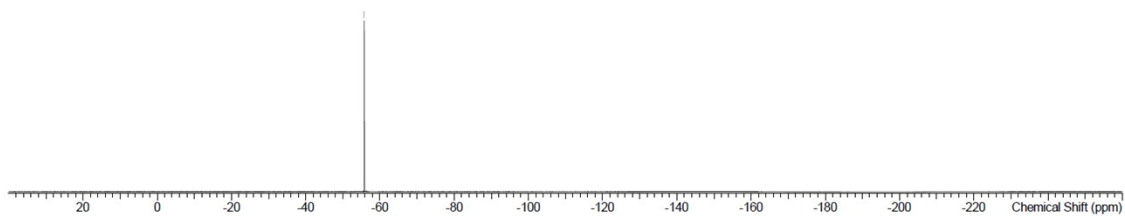

**Figure S5: HPLC of 1**

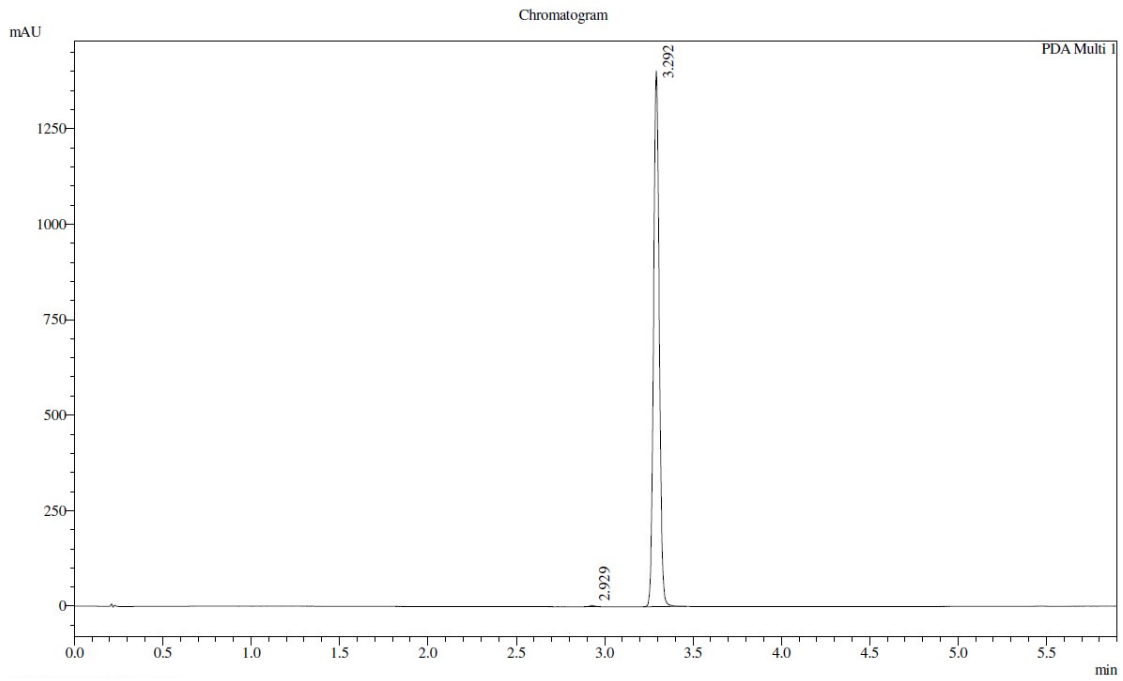

PDA Ch1 220nm 4nm

| Peak# | Ret. Time | Height  | Height % | USP Width | Area    | Area % |
|-------|-----------|---------|----------|-----------|---------|--------|
| 1     | 2.929     | 3030    | 0.215    | 0.057     | 6247    | 0.198  |
| 2     | 3.292     | 1403297 | 99.785   | 0.060     | 3151804 | 99.802 |

**Figure S6: LCMS of 1**

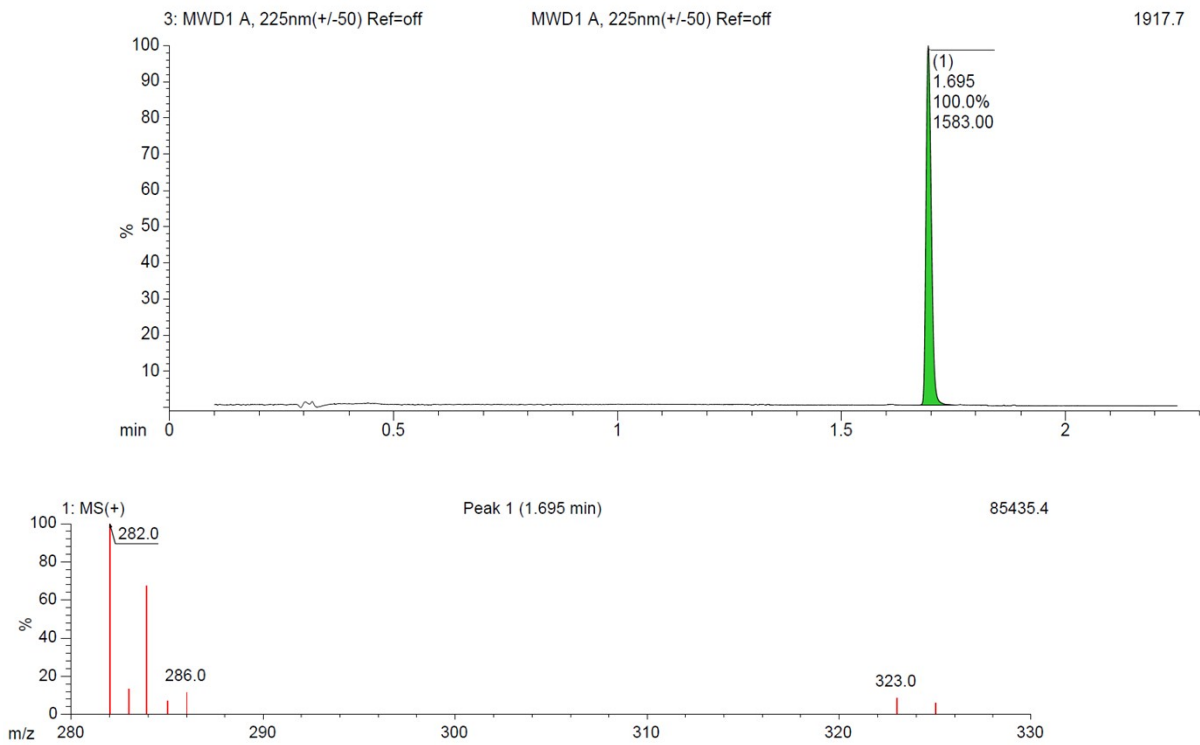

Figure S7: Spectral and analytical data for 2,4-dichloro-3-(trifluoromethyl)aniline (4):

A.  $^1\text{H}$  NMR

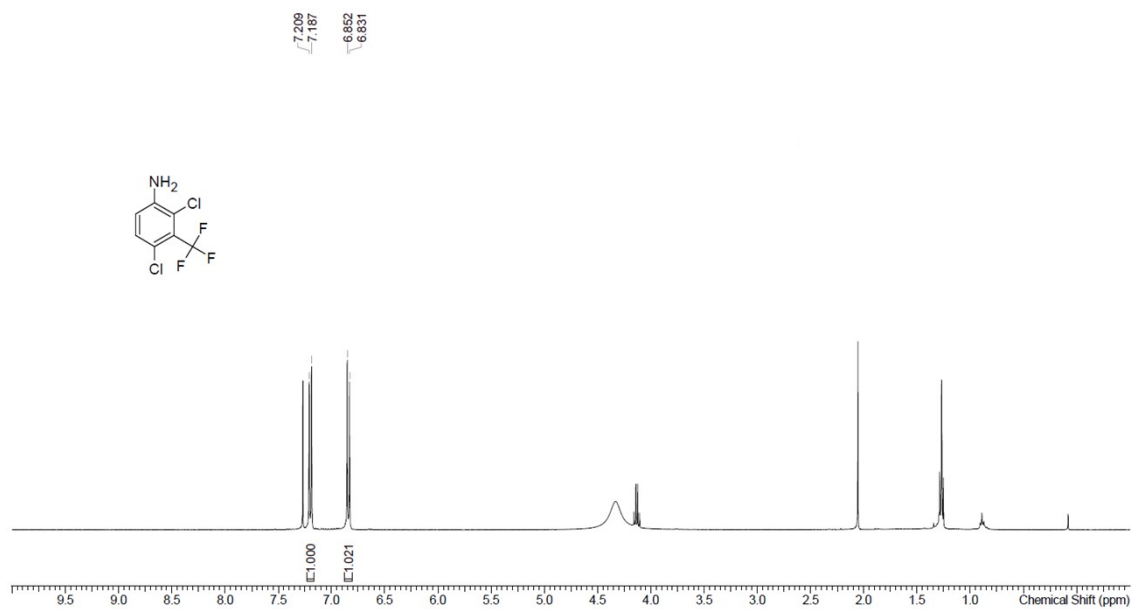

B.  $^{19}\text{F}$  NMR

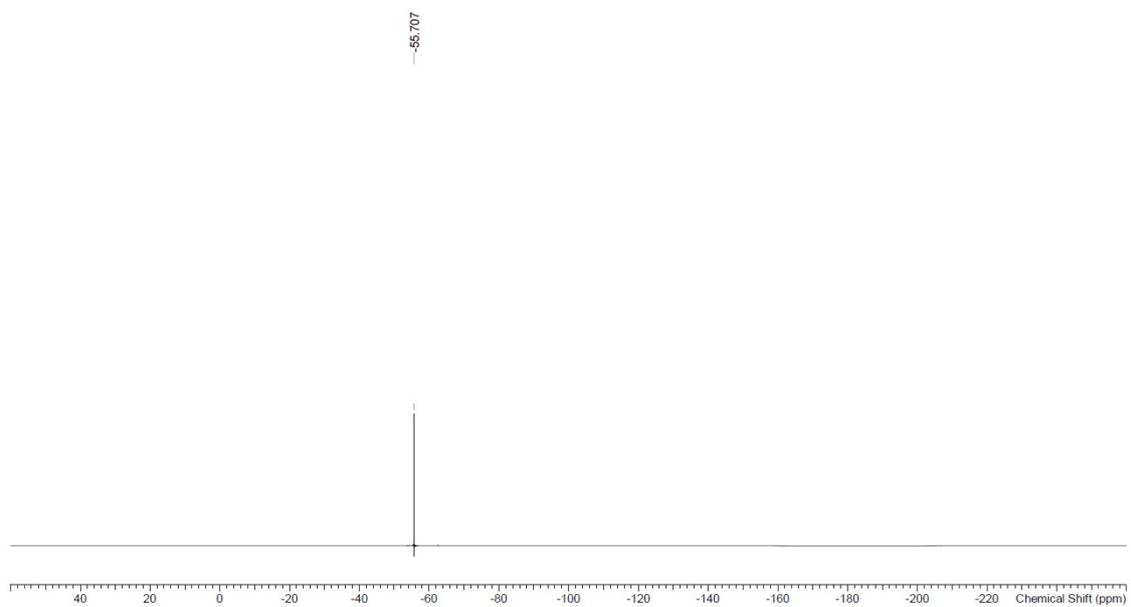

C. HPLC

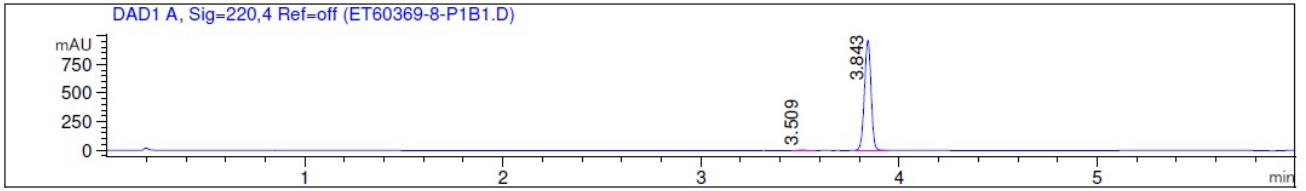

=====  
Integration Result  
=====

Singal 1 : DAD1 A, Sig=220,4 Ref=off

| # | Meas. R | Area    | Height  | Height | Width | Area % |
|---|---------|---------|---------|--------|-------|--------|
| 1 | 3.509   | 9.338   | 4.095   | 0.424  | 0.036 | 0.417  |
| 2 | 3.843   | 2.231e3 | 962.743 | 99.576 | 0.036 | 99.583 |

=====

Figure S8: Spectral and analytical data for minor impurity 1-(2-chloro-3-(trifluoromethyl)phenyl)-1H-1,2,3-triazole (9):

A.  $^1\text{H}$  NMR

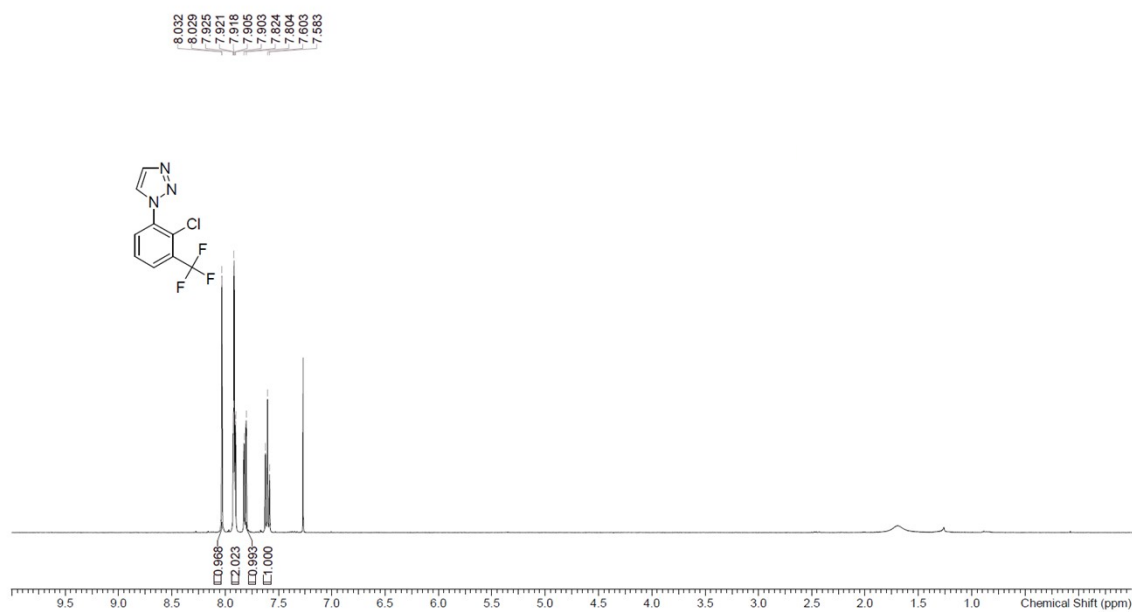

B.  $^{19}\text{F}$  NMR

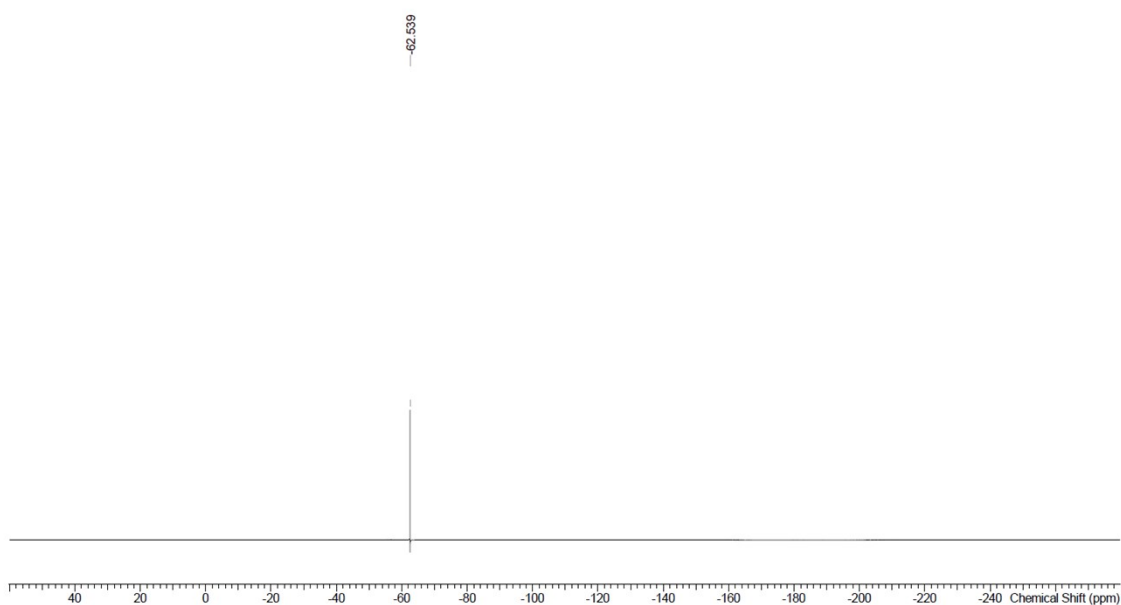



### C. HPLC

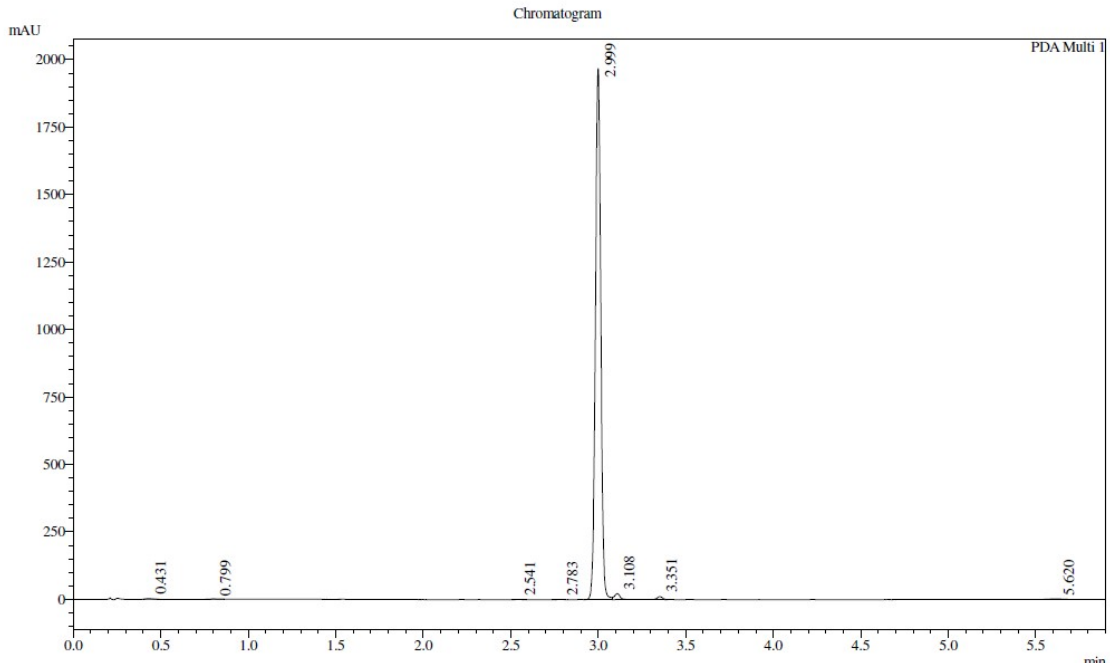

PDA Ch1 220nm 4nm

| Peak# | Ret. Time | Height  | Height % | USP Width | Area    | Area % |
|-------|-----------|---------|----------|-----------|---------|--------|
| 1     | 0.431     | 2098    | 0.105    | 0.067     | 5287    | 0.123  |
| 2     | 0.799     | 1085    | 0.054    | 0.073     | 3086    | 0.072  |
| 3     | 2.541     | 1206    | 0.060    | 0.045     | 2236    | 0.052  |
| 4     | 2.783     | 1048    | 0.052    | 0.066     | 2280    | 0.053  |
| 5     | 2.999     | 1967179 | 97.988   | 0.057     | 4200272 | 97.792 |
| 6     | 3.108     | 22056   | 1.099    | 0.061     | 50391   | 1.173  |
| 7     | 3.351     | 11062   | 0.551    | 0.055     | 22810   | 0.531  |

### D. LCMS

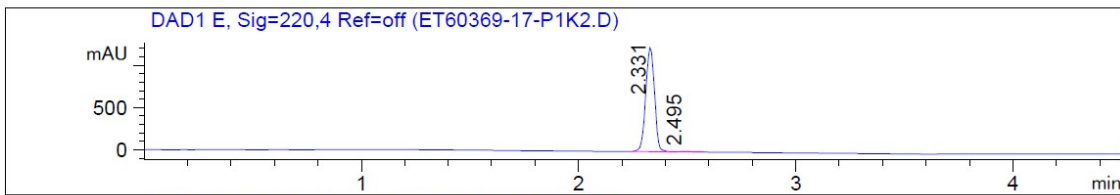

Signal 1 : DAD1 E, Sig=220,4 Ref=off

| Peak # | RT [min] | Height   | Height % | Width [min] | Area     | Area % |
|--------|----------|----------|----------|-------------|----------|--------|
| 1      | 2.331    | 1230.021 | 99.364   | 0.045       | 3483.319 | 99.301 |
| 2      | 2.495    | 7.873    | 0.636    | 0.048       | 24.537   | 0.699  |

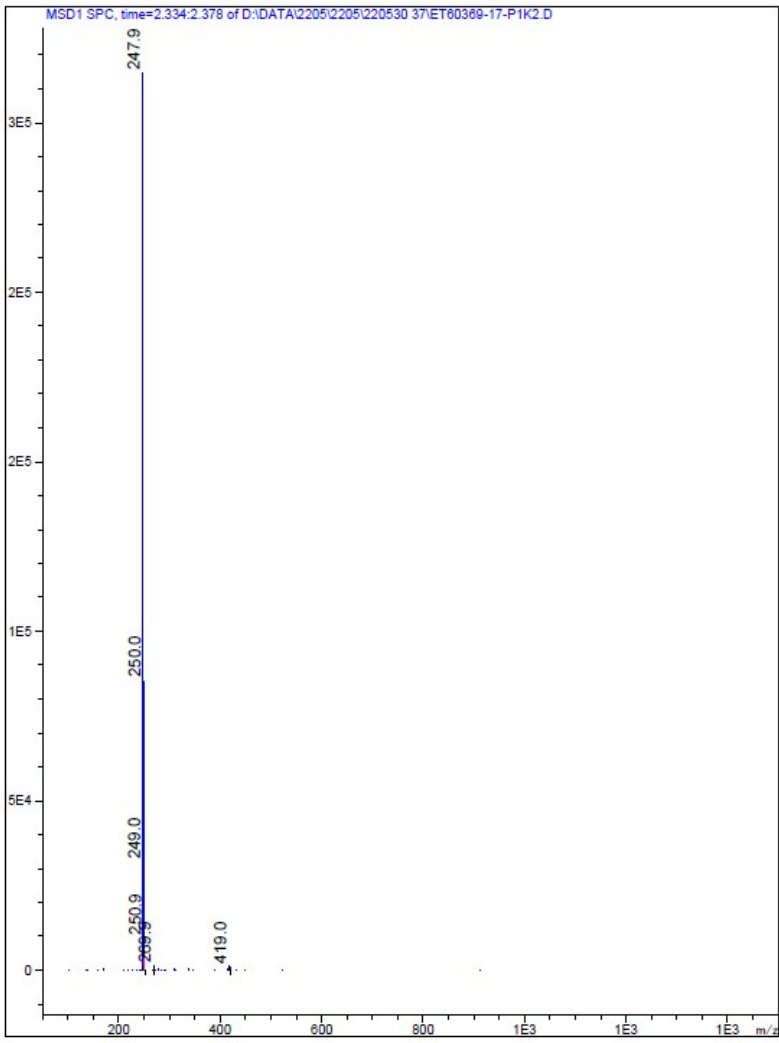

**Table S1: Pilot reactions for the chlorination of 2-chloro-3-(trifluoromethyl)aniline (**3**) with *N*-chlorosuccinimide (NCS).**

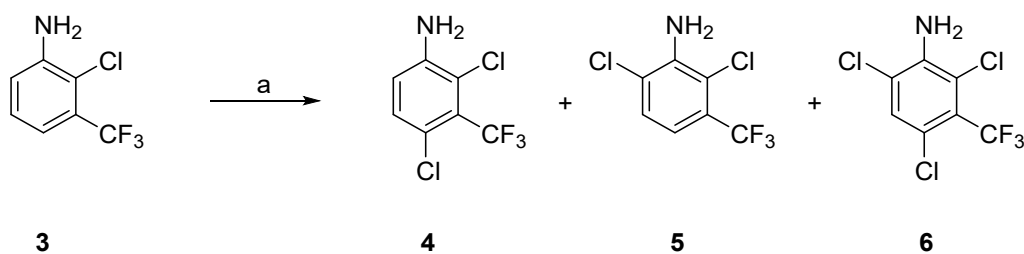

<sup>a</sup> Reagents and conditions: (a) **3** (200 mg), NCS (1.1 equiv.), solvent, temperature, time; ratio of products **3:4:5:6** determined by LCMS

| entry     | Conditions                                        | Ratio of Products        |
|-----------|---------------------------------------------------|--------------------------|
|           | solvent, temperature, time                        | <b>3 : 4 : 5 : 6</b>     |
| <b>1</b>  | CH <sub>2</sub> Cl <sub>2</sub> , 30 °C, 16 h     | 48.9 : 36.2 : 13.9 : 0   |
| <b>2</b>  | CH <sub>2</sub> ClCH <sub>2</sub> Cl, 20 °C, 16 h | 63.9 : 29.3 : 6.6 : 0    |
| <b>3</b>  | CH <sub>2</sub> ClCH <sub>2</sub> Cl, 60 °C, 16 h | 0 : 61.6 : 26.0 : 9      |
| <b>4</b>  | <i>i</i> -PrOH, 60 °C, 16 h                       | 3.8 : 61.8 : 26.9 : 4.7  |
| <b>5</b>  | AcOH, 60 °C, 16 h                                 | 0 : 50.5 : 32.9 : 11.2   |
| <b>6</b>  | DMF, 20 °C, 16 h                                  | 6.4 : 67.4 : 20.4 : 1.8  |
| <b>7</b>  | THF, 60 °C, 16 h                                  | 7.7 : 66.3 : 21.8 : 11.2 |
| <b>8</b>  | 2-MeTHF, 60 °C, 16 h                              | 36.0 : 40.5 : 18.6 : 0   |
| <b>9</b>  | MeCN, 60 °C, 16 h                                 | 0 : 70.2 : 19.5 : 9.6    |
| <b>10</b> | NCS (1.0 equiv.), MeCN, 60 °C, 16 h               | 4.0 : 69.5 : 21.4 : 4.0  |

#### LCMS of entry 9:

Compound

**4 5 6**

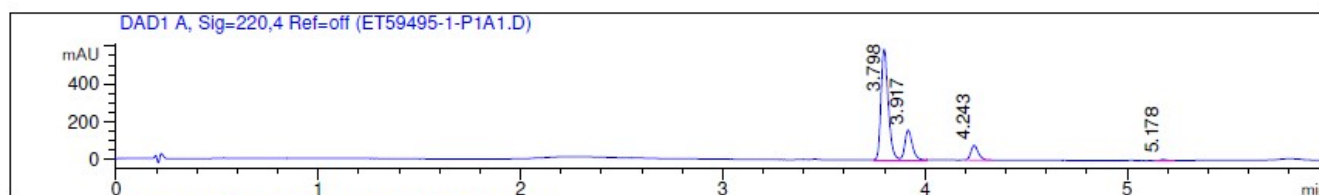

#### LCMS of entry 10:

Compound

**3 4 5 6**

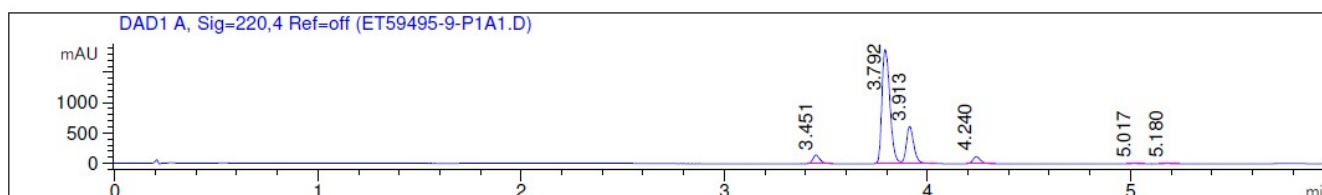

# LCMS of purified 4:

Compound

3 4

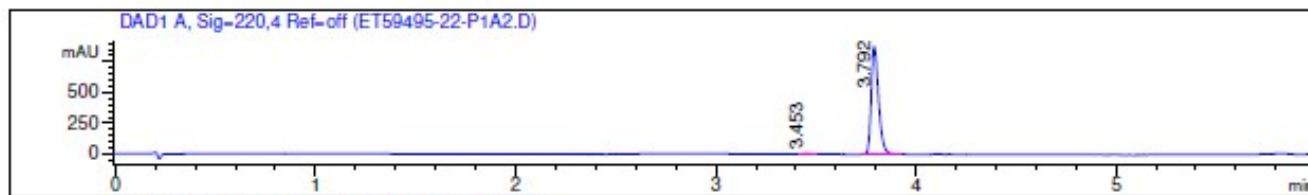

## Integration Result

Singal 1 : DAD1 A, Sig=220,4 Ref-off

| # | Meas. R | Area    | Height | Height | Width | Area % |
|---|---------|---------|--------|--------|-------|--------|
| 1 | 3.45    | 7.74    | 3.66   | 0.42   | 0.03  | 0.34   |
| 2 | 3.79    | 2246.45 | 873.62 | 99.58  | 0.04  | 99.66  |
